# Supplementary material
Source: MDPI journal article supplement (https://www.mdpi.com/2624-8611/5/1/13)
Supplement: s1 [file s1]

# Supplemental Table S1

*Effect Size Values by Sample Size when DIF was Present: Averaged over Monte Carlo replications*

| N                        | $I_{DIF}^{2*}$ | $S - DIF - V$ | $\hat{\tau}_w^2$ | $\bar{R}_\Delta^2$ | $d$  | uDTF  | sDTF%  |
|--------------------------|----------------|---------------|------------------|--------------------|------|-------|--------|
|                          |                |               |                  |                    |      | %     |        |
| 250/250                  | 0.62           | 0.20          | 0.05             | 0.009              | 0.12 | 21.05 | -16.92 |
| 500/500                  | 0.64           | 0.20          | 0.05             | 0.008              | 0.12 | 20.61 | -16.53 |
| 1000/1000                | 0.61           | 0.19          | 0.05             | 0.009              | 0.12 | 20.99 | -16.41 |
| 2000/2000                | 0.63           | 0.21          | 0.04             | 0.008              | 0.11 | 21.05 | -16.99 |
| 500/250                  | 0.63           | 0.20          | 0.05             | 0.007              | 0.12 | 20.47 | -16.32 |
| 1000/250                 | 0.61           | 0.19          | 0.04             | 0.009              | 0.13 | 20.89 | -16.44 |
| 2000/250                 | 0.64           | 0.19          | 0.04             | 0.010              | 0.11 | 20.73 | -16.81 |
| 1000/500                 | 0.65           | 0.20          | 0.06             | 0.007              | 0.12 | 21.01 | -16.75 |
| 2000/500                 | 0.63           | 0.22          | 0.05             | 0.009              | 0.13 | 20.64 | -16.41 |
| 2000/1000                | 0.64           | 0.21          | 0.05             | 0.008              | 0.10 | 20.55 | -16.57 |
| Empirical Standard Error |                |               |                  |                    |      |       |        |
| 250/250                  | 0.09           | 0.07          | 0.03             | 0.03               | 0.04 | 2.98  | 3.48   |
| 500/500                  | 0.08           | 0.07          | 0.02             | 0.02               | 0.03 | 2.73  | 3.41   |
| 1000/1000                | 0.07           | 0.05          | 0.01             | 0.01               | 0.01 | 2.48  | 3.35   |
| 2000/2000                | 0.05           | 0.04          | 0.01             | 0.01               | 0.01 | 2.36  | 3.24   |

|                          |      |      |       |       |       |       |       |
|--------------------------|------|------|-------|-------|-------|-------|-------|
| 500/250                  | 0.08 | 0.07 | 0.02  | 0.02  | 0.03  | 2.85  | 3.45  |
| 1000/250                 | 0.07 | 0.06 | 0.02  | 0.01  | 0.02  | 2.55  | 3.38  |
| 2000/250                 | 0.06 | 0.05 | 0.01  | 0.01  | 0.02  | 2.39  | 3.28  |
| 1000/500                 | 0.06 | 0.06 | 0.02  | 0.02  | 0.02  | 2.58  | 3.34  |
| 2000/500                 | 0.05 | 0.05 | 0.01  | 0.01  | 0.01  | 2.41  | 3.29  |
| 2000/1000                | 0.05 | 0.04 | 0.01  | 0.01  | 0.01  | 2.38  | 3.27  |
| Relative estimation bias |      |      |       |       |       |       |       |
| 250/250                  | 0.02 | 0.02 | 0.003 | -0.08 | -0.01 | -0.01 | -0.01 |
| 500/500                  | 0.01 | 0.03 | 0.002 | -0.08 | -0.01 | -0.02 | -0.01 |
| 1000/1000                | 0.01 | 0.02 | 0.003 | -0.06 | -0.01 | -0.02 | -0.01 |
| 2000/2000                | 0.01 | 0.02 | 0.002 | -0.07 | -0.01 | -0.01 | -0.02 |
| 500/250                  | 0.02 | 0.03 | 0.002 | -0.08 | -0.01 | -0.01 | -0.01 |
| 1000/250                 | 0.02 | 0.03 | 0.002 | -0.06 | -0.02 | -0.02 | -0.01 |
| 2000/250                 | 0.01 | 0.02 | 0.003 | -0.07 | -0.01 | -0.02 | -0.01 |
| 1000/500                 | 0.02 | 0.03 | 0.003 | -0.07 | -0.01 | -0.01 | -0.02 |
| 2000/500                 | 0.02 | 0.03 | 0.002 | -0.08 | -0.01 | -0.02 | -0.01 |
| 2000/1000                | 0.01 | 0.03 | 0.003 | -0.07 | -0.02 | -0.01 | -0.01 |

## Supplemental Table S2

*Effect Size Values by Number of Items when DIF was Present: Averaged over Monte Carlo replications*

| Items                    | $I_{DIF}^{2*}$ | $S - DIF - V$ | $\hat{\tau}_w^2$ | $\bar{R}_\Delta^2$ | $d$   | uDTF<br>% | sDTF%  |
|--------------------------|----------------|---------------|------------------|--------------------|-------|-----------|--------|
| 10                       | 0.64           | 0.21          | 0.05             | 0.008              | 0.11  | 20.85     | -16.49 |
| 20                       | 0.63           | 0.21          | 0.05             | 0.008              | 0.12  | 20.735    | -16.64 |
| Empirical Standard Error |                |               |                  |                    |       |           |        |
| 10                       | 0.08           | 0.07          | 0.03             | 0.02               | 0.03  | 2.67      | 3.39   |
| 20                       | 0.06           | 0.06          | 0.02             | 0.02               | 0.02  | 2.49      | 3.31   |
| Relative estimation bias |                |               |                  |                    |       |           |        |
| 10                       | 0.02           | 0.03          | 0.003            | -0.07              | -0.01 | -0.01     | -0.01  |
| 20                       | 0.02           | 0.03          | 0.003            | -0.07              | -0.01 | -0.01     | -0.01  |
